## SHORT COMMUNICATION

The invasive ctenophore *Mnemiopsis leidyi* overwinters in high abundances in the subarctic Baltic Sea

SATU VIITASALO\*, MAIJU LEHTINIEMI AND TARJA KATAJISTO

FINNISH INSTITUTE OF MARINE RESEARCH, PO BOX 2 FI-00561, HELSINKI, FINLAND

\*CORRESPONDING AUTHOR: satu.viitasalo@fimr.fi

Received June 6, 2008; accepted in principle July 24, 2008; accepted for publication August 13, 2008; published online August 22, 2008

Corresponding editor: Roger Harris

*We report successful overwintering of the invasive ctenophore Mnemiopsis leidyi in the Baltic Sea, demonstrated by the highest abundances ever observed in the northern parts of this subarctic brackish-water ecosystem.*

The invasive ctenophore *Mnemiopsis leidyi* has had tremendous ecological and economic effects in a range of habitats, such as the brackish Black and Caspian Seas (Knowler, 2005), virtually changing the structure of the entire zooplankton community as well as contributing to a collapse of several fisheries (Vinogradov *et al.*, 1989; Purcell *et al.*, 2001; Finenko *et al.*, 2006). *Mnemiopsis leidyi* first invaded the southern Baltic Sea in autumn 2006 (Hansson, 2006; Javidpour *et al.*, 2006) and currently occupies the whole Baltic area, exclusive only of the northernmost basin of the Gulf of Bothnia (Bothnian Bay) and the eastern end of the Gulf of Finland. The capability of this ctenophore to tolerate a wide range of abiotic conditions led to speculation about its potential to sustain viable populations and to survive through the winter in the northern Baltic Sea. This is a subarctic brackish-water ecosystem characterized by scarce pelagic food, surface temperatures of 0–2°C and partial ice-cover (Myrberg *et al.*, 2006). While *M. leidyi* has been observed to overwinter in the southern Baltic Sea (Kube *et al.*, 2007), this study demonstrates successful overwintering and high abundances of the invader in cold low-saline waters of the northern Baltic Sea.

Distribution and abundance of *M. leidyi* were surveyed during January 2008. The study was carried out on a regular HELCOM monitoring cruise on board R/V Aranda (Finnish Institute of Marine Research). The ctenophore sampling was performed with a 500 µm mesh WP-2 plankton net with a cod end (100 µm mesh size). The samples were collected from both the southern, central and northern Baltic Sea (Fig. 1), excluding the easternmost Gulf of Finland, where the occurrence was monitored in December 2007 (Lehtiniemi *et al.*, 2007). Three replicate tows from the bottom to the surface at a rate of 0.5 m s<sup>-1</sup> were taken at each station. Ctenophores were counted from unpreserved samples with 10–60× magnification immediately after collection, and a subsample of at least 50 specimens from 10 stations were measured for length (aboral–oral dimension, including lobes) and assigned to size classes to the closest 0.5 mm. The counts per tow were converted to abundances (ind. m<sup>-2</sup>) by dividing the values by the towed area (0.25 m<sup>2</sup>).

To define the vertical distribution of *M. leidyi* as well as potential food resources (micro- and zooplankton) in winter, additional sampling was performed in March

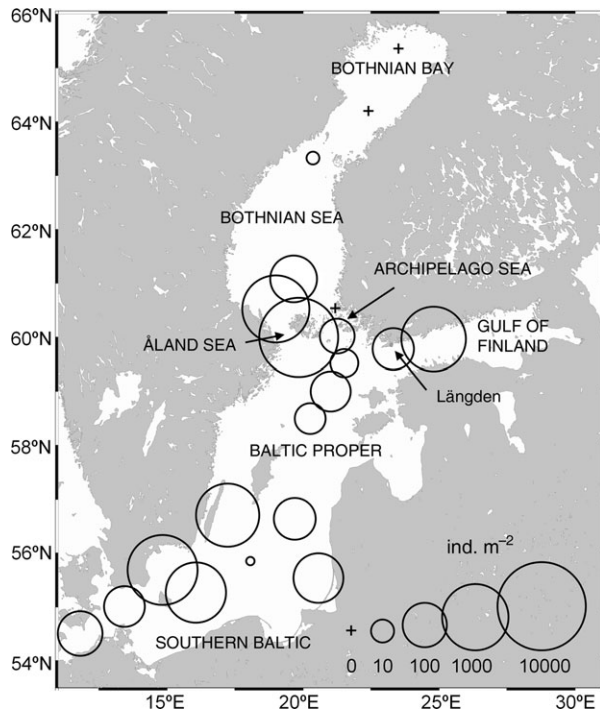

**Fig. 1.** Occurrence and abundances of *Mnemiopsis leidyi* in the Baltic Sea in January–March 2008. The diameter of the circle denotes the abundance in ind. m<sup>-2</sup> on a logarithmic scale.

2008 from the Tvärminne Zoological Station, University of Helsinki, SW coast of Finland. Samples were taken with a vertically towed 200 µm mesh WP-2 plankton net equipped with a closing mechanism from a 60 m deep coastal station, Långden (Fig. 1). The use of a smaller mesh size in March than in January (200 µm instead of 500 µm) may have slightly overestimated the numbers of small specimens in March compared with those in January. Three tows were taken with depth intervals of 20–0 m, 40–20 m and 55–40 m. Additionally, two continuous hauls from the bottom (~55 m) to the surface were taken. For the total abundance determination, the data from the three stratified and the two continuous hauls were combined to obtain three replicates (from the bottom to the surface). Due to heavy weather conditions, the upper end of the net could not be rinsed before collecting the samples, which may have resulted in an underestimation of the total abundances. The net was rinsed, however, in between the tows. The samples were placed in 3 L buckets and transferred to the laboratory for microscopic examination. *Mnemiopsis leidyi* was counted and measured for length from the unpreserved samples, as described earlier, after which the samples were preserved in Lugol's solution for zooplankton counting with an inverted microscope with 50× magnification. To determine microplankton abundance in the water

column, water samples from depths of 3, 10, 17, 23, 30, 37, 43, 50 and 57 m were collected with a 5 L Limnos sampler and pooled into three samples (0–20 m, 20–40 m and 40–60 m). From each pooled sample, a 1 L subsample was preserved in Lugol's solution and examined with an inverted microscope with 50–100× magnification.

The abundance data of *M. leidyi* were converted to biomass (wet weight and carbon content) values using the following equations:

$$\text{Wet weight (g)} = 0.0011k^{2.34} \quad (1)$$

$$\text{Carbon content (mg)} = 0.0017k^{2.0138} \quad (2)$$

where  $k$  is the median length (mm) of each size group (Kideys and Moghim, 2003; Sullivan and Gifford, 2004).

Carbon content values for zooplankton were obtained from Vihervaluoto and Viitasalo (Vihervaluoto and Viitasalo, 2001), for ciliates from Putt and Stoecker (Putt and Stoecker, 1989) and for other microplankton (mainly dinoflagellates and diatoms) from Menden-Deuer and Lessard (Menden-Deuer and Lessard, 2000).

An estimate of total ingestion ( $I$ ) of microplankton was calculated using the carbon content ( $C$ ) obtained from equation (2) (Sullivan and Gifford, 2004):

$$I = 0.4 \mu\text{g C } \mu\text{g}^{-1} \text{ C day}^{-1} \quad (3)$$

This estimate represents the smallest ctenophore size category (1 mm) used by Sullivan and Gifford (Sullivan and Gifford, 2004), and was selected due to the dominance of small individuals (95% ≤ 2 mm) in our data as well as the fact that this estimate was obtained from grazing experiments with the lowest prey C content (59 µg C L<sup>-1</sup>), which best corresponds to the situation in our study.

Theoretical clearance rates ( $c$ ) on microplankton were estimated using the equation (Sullivan and Gifford, 2004):

$$c \text{ (mL ind.}^{-1} \text{ h}^{-1}) = 9.36k + 4.54 \quad (4)$$

The difference in ctenophore abundances between stations with and without a distinctive halocline was tested with a Student's  $t$ -test. Correlation between the depth of the station and the abundance and biomass of *M. leidyi* at each station (excluding stations with no ctenophores) were tested using the Pearson's correlation test. The abundance and biomass data were log-

Table I: Sampling stations, hydrographic conditions, abundance and biomass of *Mnemiopsis leidyi* in the Baltic Sea

| Location        | Station | Latitude | Longitude | Date        | Depth max (m) | Salinity (psu) | Temp. (°C) | Depth of the clines (m) | Abundance (ind. m <sup>-2</sup> ) | Biomass (g ww m <sup>-2</sup> ) |
|-----------------|---------|----------|-----------|-------------|---------------|----------------|------------|-------------------------|-----------------------------------|---------------------------------|
| Bothnian Bay    | F2      | 65°23.02 | 23°27.76  | 12 Jan 2008 | 74            | 3              | 0.5–3      | T20                     | 0                                 | 0                               |
| Bothnian Bay    | F16     | 64°18.30 | 22°21.50  | 14 Jan 2008 | 42            | 3.5–5          | 0.5–1      | HT15                    | 0                                 | 0                               |
| Bothnian Sea    | SR5     | 61°05.00 | 19°35.00  | 10 Jan 2008 | 110           | 5.5–6.5        | 3.5–5      | T70                     | 129.3                             | 3.03                            |
| Bothnian Sea    | F18     | 63°18.86 | 20°16.36  | 12 Jan 2008 | 92            | 5.5            | 3.5        | –                       | 2.7                               | No data                         |
| Åland Sea       | F67     | 59°56.00 | 19°49.80  | 9 Jan 2008  | 190           | 6–7            | 4–6.5      | –                       | 3809.3                            | 10.89                           |
| Åland Sea       | F33     | 60°31.99 | 18°56.26  | 10 Jan 2008 | 120           | 5.5–6.5        | 3–5        | –                       | 1117.3                            | 7.32                            |
| Archipelago Sea | IU2     | 60°35.01 | 21°07.80  | 17 Jan 2008 | 37            | 6.5            | 2.5        | –                       | 0                                 | 0                               |
| Gulf of Finland | LL7     | 59°50.79 | 24°50.27  | 31 Jan 2008 | 90            | 6–7            | 3–5        | –                       | 842.7                             | No data                         |
| Gulf of Finland | Längden | 59°45.58 | 23°15.23  | 4 Mar 2008  | 60            | 6–6.5          | 2          | –                       | 73.3                              | 0.03                            |
| Baltic Proper   | Teili   | 59°26.00 | 21°29.81  | 8 Jan 2008  | 110           | 5              | 6.5        | HT80                    | 17.3                              | 0.01                            |
| Baltic Proper   | IU6     | 59°56.21 | 21°13.26  | 17 Jan 2008 | 110           | 6.5            | 4          | –                       | 37.3                              | No data                         |
| Baltic Proper   | LL17    | 59°02.00 | 21°04.77  | 21 Jan 2008 | 150           | 7–11           | 4.5–5.5    | H80                     | 64.0                              | No data                         |
| Baltic Proper   | F79     | 58°27.00 | 20°10.00  | 22 Jan 2008 | 95            | 7.5–10.5       | 5–5.5      | H65                     | 24.0                              | No data                         |
| Southern Baltic | BY10    | 56°38.00 | 19°35.00  | 23 Jan 2008 | 135           | 7–12           | 4–6        | HT55                    | 78.7                              | No data                         |
| Southern Baltic | 6B      | 55°31.84 | 20°33.83  | 23 Jan 2008 | 55            | 7.5–10.5       | 5–6        | HT55                    | 178.7                             | No data                         |
| Southern Baltic | STB8    | 54°26.00 | 11°36.00  | 27 Jan 2008 | 18            | 18.5–21        | 4.5–5      | –                       | 105.3                             | 1.18                            |
| Southern Baltic | BY1     | 55°00.00 | 13°18.00  | 28 Jan 2008 | 39            | 8.5–20         | 4–5.5      | H25                     | 68.0                              | 0.23                            |
| Southern Baltic | HBP215  | 55°37.00 | 14°52.00  | 28 Jan 2008 | 70            | 7.5–8.5        | 4.5–9.5    | HT50                    | 1462.7                            | 4.09                            |
| Southern Baltic | BY5     | 55°15.00 | 15°59.00  | 29 Jan 2008 | 80            | 7.5–16         | 4.5–10     | HT50                    | 545.3                             | 2.03                            |
| Southern Baltic | BCSIII8 | 55°51.00 | 18°03.00  | 29 Jan 2008 | 46            | 7–9.5          | 4–5        | HT45                    | 1.3                               | No data                         |
| Southern Baltic | BCSIII2 | 56°42.00 | 17°07.00  | 30 Jan 2008 | 75            | 7–9.5          | 4–5        | HT55                    | 740.0                             | 0.22                            |

Depth max denotes the depth of the station, whereas depth of the clines specifies the upper depth of the halo- (*H*) and thermoclines (*T*).

transformed to normalize the distributions. All statistics were performed using SPSS 15.0 software.

At 11 stations out of 21, a halocline was detected at depths of 15–80 m (Table I). Neither halocline nor thermocline was observed at eight stations, indicative of a thoroughly mixed water column. Ctenophores were found at all stations except in the Bothnian Bay (two stations) and at a single station in the Archipelago Sea. No difference was found in ctenophore abundances between stations with and without a halocline ( $t = 1.01$ ,  $df = 16$ ,  $P = 0.33$ ). At the stations where ctenophores occurred, the surface and deep-water salinity ranged between 5.0–18.5 psu and 5.0–21.0 psu, respectively, while the corresponding temperature ranges were 2.0–6.5°C and 2.0–10.0°C, respectively (Table I). In comparison, salinity and temperature in the Bothnian Bay were only 3–5 psu and 0.5–3.0°C. The present data show that *M. leidyi* does occur at very low temperatures (2°C), while it does not appear to tolerate salinities <5 psu. Although showing wide tolerance to these

abiotic parameters (Purcell *et al.*, 2001), *M. leidyi* seems to be close to the limit of its occurrence in conditions where both are low.

The total abundances of *M. leidyi* ranged between 1 and 3809 ind. m<sup>-2</sup> (Fig. 1 and Table I), the maximum value being the highest ever found in the northern Baltic Sea, and 6-fold greater than that (619 ind. m<sup>-2</sup>) observed in autumn 2007 (Lehtiniemi *et al.*, 2007). Despite different sampling methods, these values are also two orders of magnitude higher than those recently observed in the southern Baltic (Huwert *et al.*, 2008). While the abundances in the north were higher in the sampling performed in January 2008 than in August–September 2007, temperature and salinity conditions had not changed radically, implying that hydrographic parameters did not preclude larval survival and thereby growth of *M. leidyi* populations. Compared with the size distribution in the ponto-Caspian region, the Baltic specimens were small, ≤10 mm in the north (>59°N) and ≤40 mm in the south (<57°N). Overall, 95% of all

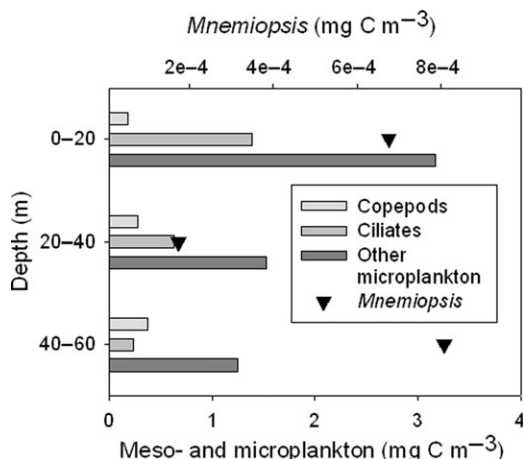

**Fig. 2.** Vertical distribution and biomass of *Mnemiopsis leidy*, copepods and microplankton in Längden, SW coast of Finland, March 2008.

specimens were  $\leq 2$  mm, resulting in low biomass. The maximum biomass ( $10.9 \text{ g ww m}^{-2}$ ) co-occurred with the maximum abundance in the Åland Sea (Table I).

Previous studies in the Baltic Sea have shown that *M. leidy* occurs deep in the water column, near the halocline (60–80 m) (Haslob *et al.*, 2007; Lehtiniemi *et al.*, 2007; Huwer *et al.*, 2008). In this study, however, the vertical distribution data from Längden showed that under well-mixed conditions, the ctenophores occurred in all water layers (Fig. 2). Although the total ctenophore biomass correlated positively with the depth of the station ( $r = 0.65$ ,  $P = 0.04$ ,  $n = 10$ ), indicating preference for deep waters, no correlation was observed between the abundance and the station depth ( $r = 0.28$ ,  $P = 0.26$ ,  $n = 18$ ). All ctenophores in Längden were larval stages  $< 1$  mm. The zooplankton community was mainly composed of copepods, the total biomass varying between 0.2 and 0.3  $\text{mg C m}^{-3}$  in the different water layers, while the microplankton community was dominated by dinoflagellates, the total biomass being 1.5–4.6  $\text{mg C m}^{-3}$  (Fig. 2 and Table II). In summer, the biomass is typically one to two orders of magnitude higher (Uitto, 1996). The most abundant taxa were *Acartia* spp., *Centropages hamatus*, *Eurytemora affinis*, *Temora longicornis*, *Scrippsiella* sp. and *Myrionecta rubra* (Table II). In an experimental study by Sullivan and Gifford (Sullivan and Gifford, 2004), *M. rubra* was a positively selected prey item over a span of microplankton taxa, suggesting that suitable prey were present in the water column. Using equation (3), *M. leidy* in Längden (total biomass  $0.03 \text{ g ww m}^{-2}$  and  $30.4 \text{ } \mu\text{g C m}^{-2}$ ) could ingest  $0.1$ – $0.3 \text{ } \mu\text{g C m}^{-3} \text{ day}^{-1}$  in the three different depth strata,

**Table II:** Biomasses of microplankton and mesozooplankton as means over three depth layers (0–20, 20–40 and 40–60 m) in Längden, Gulf of Finland

| Species/taxon                                          | mg C m <sup>-3</sup> |
|--------------------------------------------------------|----------------------|
| <b>Dinoflagellata</b>                                  |                      |
| <i>Scrippsiella</i> sp./ <i>Woloszynskia</i> sp.       | 1.12                 |
| Dinoflagellata $> 30 \text{ } \mu\text{m}$             | 0.03                 |
| Dinoflagellata $30 \text{ } \mu\text{m}$               | 0.04                 |
| Dinoflagellata $25 \text{ } \mu\text{m}$               | 0.08                 |
| Dinoflagellata $20 \text{ } \mu\text{m}$               | 0.18                 |
| Dinoflagellata $15 \text{ } \mu\text{m}$               | 0.03                 |
| Dinoflagellata $10 \text{ } \mu\text{m}$               | $< 0.01$             |
| Dinoflagellata $< 10 \text{ } \mu\text{m}$             | $< 0.01$             |
| <i>Gymnodinium vestificii</i>                          | 0.01                 |
| <i>Amphidinium longum</i>                              | 0.01                 |
| <i>Peridiniella catenata</i>                           | 0.14                 |
| <i>Dinophysis acuminata</i>                            | 0.03                 |
| <i>Dinophysis rotundata</i>                            | $< 0.01$             |
| <i>Protoperidinium granii</i>                          | $< 0.01$             |
| <i>Gyrodinium</i> sp. $60$ – $70 \text{ } \mu\text{m}$ | 0.01                 |
| <i>Gyrodinium</i> sp. $100 \text{ } \mu\text{m}$       | 0.03                 |
| Total Dinoflagellata                                   | 1.71                 |
| <b>Diatoma</b>                                         |                      |
| <i>Skeletonema costatum</i>                            | 0.02                 |
| <i>Melosira</i> sp.                                    | $< 0.01$             |
| <i>Achnantes taeniata</i>                              | 0.01                 |
| <i>Thalassiosira</i> sp.                               | 0.22                 |
| <i>Chaetoceros</i> sp.                                 | $< 0.01$             |
| <i>Chaetoceros wighamii</i>                            | $< 0.01$             |
| <i>Chaetoceros holsaticus</i>                          | $< 0.01$             |
| <i>Nitzschia</i> sp.                                   | $< 0.01$             |
| <i>Tabellaria</i> sp.                                  | 0.01                 |
| <i>Navicula</i> sp.                                    | $< 0.01$             |
| Total Diatoma                                          | 0.26                 |
| <b>Cryptophyceae</b>                                   |                      |
| <i>Teleaulax acuta</i>                                 | 0.01                 |
| <b>Ciliata</b>                                         |                      |
| <i>Myrionecta rubra</i>                                | 0.39                 |
| <i>Mesodinium pulex</i>                                | $< 0.01$             |
| <i>Askenasia stellaris</i>                             | 0.02                 |
| <i>Lacrymaria rostrata</i>                             | 0.02                 |
| <i>Urotricha</i> sp.                                   | $< 0.01$             |
| <i>Strombidium conicum</i>                             | 0.17                 |
| <i>Strombidium emergens</i>                            | 0.04                 |
| <i>Strombidium</i> sp. 40–50                           | 0.02                 |
| <i>Strombidium</i> sp. 25–30                           | 0.01                 |
| <i>Strombidium</i> sp. $< 25 \text{ } \mu\text{m}$     | $< 0.01$             |
| <i>Tintinnopsis beroidea</i>                           | $< 0.01$             |
| <i>Tintinnopsis lobiancoi</i>                          | 0.01                 |
| <i>Tintinnidium fluviatile</i>                         | 0.01                 |
| Ciliata sp. $60 \text{ } \mu\text{m}$                  | 0.05                 |
| Ciliata sp. small                                      | $< 0.01$             |
| Total Ciliata                                          | 0.75                 |
| <b>Copepoda</b>                                        |                      |
| <i>Centropages hamatus</i>                             | 0.04                 |
| <i>Pseudocalanus acuspes</i>                           | 0.01                 |
| <i>Acartia</i> spp.                                    | 0.09                 |
| <i>Eurytemora affinis</i>                              | 0.02                 |
| <i>Temora longicornis</i>                              | 0.06                 |
| <i>Limnocalanus macrurus</i>                           | $< 0.01$             |
| Total Copepoda                                         | 0.21                 |

while the mesozooplankton community totaled 200–350  $\mu\text{g C m}^{-3}$ , ciliates 240–1380  $\mu\text{g C m}^{-3}$  and other microplankton 1250–3170  $\mu\text{g C m}^{-3}$ . These calculations indicate that food was not the limiting factor in Långden. It is possible that the low *M. leidyi* abundances at the sampling site were either due to the low temperature (2°C), late sampling date (March) or strong wintertime currents (Myrberg *et al.*, 2006), leading to a patchy distribution.

In addition to Långden, potential ingestion rates of the *M. leidyi* population were estimated for the two stations in the Åland Sea with the highest ctenophore biomasses in January, F67 (biomass 10.9 g ww  $\text{m}^{-2}$ ) and F33 (7.3 g ww  $\text{m}^{-2}$ ). These calculations yield a total ingestion of 5910  $\mu\text{g C day}^{-1}$  (F67) and 2980  $\mu\text{g C day}^{-1}$  (F33), being high compared with the wintertime food conditions in Långden. Unfortunately, no data on micro- and zooplankton in the Åland Sea could be collected due to strong winds, which precludes conclusions on potential food limitation. The clearance rate estimates [given by equation (4)] of the ctenophore population feeding on microplankton prey were 1510 and 530  $\text{L m}^{-2} \text{day}^{-1}$  for the same two stations, converting to 1.5 and 0.5  $\text{m}^3 \text{m}^{-2} \text{day}^{-1}$  or 1.5% and 0.5% of the water column daily (assuming all ctenophores were within the uppermost 100 m). It should be noted that these estimates are only suggestive and should be interpreted carefully. However, they indicate a low population clearance capacity compared with that (up to 60%) calculated by Sullivan and Gifford (Sullivan and Gifford, 2004) for the native *M. leidyi* population in Narragansett Bay, NW coast of USA.

It must be emphasized that the winter of 2008 was ice-free and very mild, and in more adverse winters low temperatures together with scarce food could restrict the abundance of *M. leidyi* populations. However, the present study demonstrates that this ctenophore is capable of surviving and sustaining high population abundances during the Baltic winter. Future studies should examine which factors control further dispersal and increase of the Baltic *M. leidyi*. For example, growth of *M. leidyi* populations is often found to be food limited (Purcell *et al.*, 2001), but whether this is the case also for the overwintering deep-water ctenophores in the northern Baltic Sea remains to be studied.

## SUPPLEMENTARY DATA

Supplementary data can be found online at <http://plankt.oxfordjournals.org>.

## FUNDING

Funding was provided by the Academy of Finland, the Walter and Andrée de Nottbeck foundation and the Finnish Institute of Marine Research.

## ACKNOWLEDGEMENTS

We wish to thank S. Saesmaa and O. Setälä for plankton analyses, T. Sjölund for invaluable assistance in the field in March 2008, the crew of R/V Aranda for professional maritime operation and H. Haahti for being an enthusiastic cruise leader. Comments by three reviewers helped to improve the manuscript.

## REFERENCES

- Finenko, G. A., Kideys, A. E., Anninsky, B. E. *et al.* (2006) Invasive ctenophore *Mnemiopsis leidyi* in the Caspian Sea: feeding, respiration, reproduction and predatory impact on the zooplankton community. *Mar. Ecol. Prog. Ser.*, **314**, 171–185.
- Hansson, H. G. (2006) Ctenophores of the Baltic and adjacent Seas—the invader *Mnemiopsis* is here!. *Aquat. Invasions*, **1**, 295–298.
- Haslob, H., Clemmesen, C., Schaber, M. *et al.* (2007) Invading *Mnemiopsis leidyi* as a potential threat to Baltic fish. *Mar. Ecol. Prog. Ser.*, **349**, 303–306.
- Huwer, B., Storr-Paulsen, M., Riisgård, H. U. *et al.* (2008) Abundance, horizontal and vertical distribution of the invasive ctenophore *Mnemiopsis leidyi* in the central Baltic Sea, November 2007. *Aquat. Invasions*, **3**, 113–124.
- Javidpour, J., Sommer, U. and Shiganova, T. (2006) First record of *Mnemiopsis leidyi* A. Agassiz 1865 in the Baltic Sea. *Aquat. Invasions*, **1**, 299–302.
- Kideys, A. E. and Moghim, M. (2003) Distribution of the alien ctenophore *Mnemiopsis leidyi* in the Caspian Sea in August 2001. *Mar. Biol.*, **142**, 163–171.
- Knowler, D. (2005) Reassessing the costs of biological invasion: *Mnemiopsis leidyi* in the Black sea. *Ecol. Econ.*, **52**, 187–199.
- Kube, S., Postel, L., Honnef, C. *et al.* (2007) *Mnemiopsis leidyi* in the Baltic Sea—distribution and overwintering between autumn 2006 and spring 2007. *Aquat. Invasions*, **2**, 137–145.
- Lehtiniemi, M., Pääkkönen, J.-P., Flinkman, J. *et al.* (2007) Distribution and abundance of the American comb jelly (*Mnemiopsis leidyi*)—a rapid invasion to the northern Baltic Sea during 2007. *Aquat. Invasions*, **2**, 445–449.
- Menden-Deuer, S. and Lessard, E. J. (2000) Carbon to volume relationships for dinoflagellates, diatoms, and other protist plankton. *Limnol. Oceanogr.*, **45**, 569–579.
- Myrberg, K., Leppäranta, M. and Kuosa, H. (2006) Itämeren fysiikka, tila ja tulevaisuus. Yliopistopaino, Helsinki.
- Purcell, J. E., Shiganova, T. A., Decker, M. B. *et al.* (2001) The ctenophore *Mnemiopsis* in native and exotic habitats: U.S. estuaries versus the Black Sea basin. *Hydrobiologia*, **451**, 145–176.
- Putt, M. and Stoecker, D. K. (1989) An experimentally determined carbon: volume ratio for marine “oligotrichous” ciliates from estuarine and coastal waters. *Limnol. Oceanogr.*, **34**, 1097–1103.



- Sullivan, L. J. and Gifford, D. J. (2004) Diet of the larval ctenophore *Mnemiopsis leidyi* A. Agassiz (Ctenophora, Lobata). *J. Plankton Res.*, **26**, 417–431.
- Uitto, A. (1996) Summertime herbivory of coastal mesozooplankton and metazoan microplankton in the northern Baltic Sea. *Mar. Ecol. Prog. Ser.*, **132**, 47–56.
- Viherluoto, M. and Viitasalo, M. (2001) Temporal variability in functional responses and prey selectivity of pelagic mysid, *Mysis mixta*, in natural prey assemblages. *Mar. Biol.*, **138**, 575–583.
- Vinogradov, M. E., Shushkina, E. A., Musayeva, E. I. *et al.* (1989) A new exotic species in the Black Sea: the ctenophore *Mnemiopsis leidyi* (Ctenophora: Lobata). *Oceanology*, **29**, 220–224.
